# Supplementary material for: The ratio of cancer cells to stroma after induction therapy in the treatment of non-small cell lung cancer
Source: Springer Nature journal article supplement (doi:10.1007/s00432-016-2271-8), 2016-09-17
Supplement: MOESM1 [file 10710294]

**Supplemental table 1**

| Chemotherapy regimens | N |
| --- | --- |
| *Chemotherapy　group* |  |
| platinum-based combination  cisplatin; vindesine or vinorelbine or docetaxel or gemcitabine or etoposide carboplatin; paclitaxel ±bevacizumab nedaplatin; docetaxel | 25 |
| mitomycin; vindesine; cisplatin | 8 |
| docetaxel | 2 |
| *Chemoradiotherapy group* |  |
| platinum-based combination  cisplatin; vinorelbine or S-1  carboplatin; paclitaxel | 36 |
| mitomycin; vindesine; cisplatin | 3 |

**Supplemental table 2 Univariate analyses for overall survival.**

|  |  | Univariate analysis | |
| --- | --- | --- | --- |
|  |  | HR (95% CI) | *p* - value |
| Total area of AE1/3(+)  cancer cells (mm2) | > 400 / ≤ 400 | 0.91 (0.27 - 3.05) | 0.881 |
| Percentage of AE1/3(+) cancer cells (%) | > 10 / ≤10 | 1.64 (0.83 - 3.22) | 0.152 |
